# Supplementary material for: Mitochondrial Genomes Yield Insights into the Basal Lineages of Ichneumonid Wasps (Hymenoptera: Ichneumonidae)
Source: MDPI journal article supplement (doi:10.3390/genes13020218), 2022-01-25
Supplement: s1 [file s1]

## Supplementary tables

**Table S1** Information for the samples sequenced in this study.

| Voucher specimens | Subfamily   | Species                    | Sex    | Collection Place |
|-------------------|-------------|----------------------------|--------|------------------|
| ZJUHW_202000017   | Xoridinae   | <i>Odontocolon</i> sp.     | Female | Liaoning, China  |
| ZJUHW_202000018   | Xoridinae   | <i>Xorides funiuensis</i>  | Female | Sichuan, China   |
| ZJUHW_202000019   | Eucerotinae | <i>Euceros kiushuensis</i> | Female | Tibet, China     |
| ZJUHW_202000020   | Eucerotinae | <i>Euceros serricornis</i> | Female | Sichuan, China   |

**Table S2** Best model list from PartitionFinder for seven subsets including 39 PCGs partitions (every PCG gene was part to tree partitions as p1, p2 and p3) and two subsets including 13 AA partitions for MrBayes.

| Subset | Best Model | Partition Names                                       |
|--------|------------|-------------------------------------------------------|
| 1      | GTR+I+G    | c3p1, a6p1, n3p1, c1p1, c2p1, cbp1                    |
| 2      | F81+G      | n2p1, a8p1, n6p1                                      |
| 3      | HKY+G      | n4lp3, n5p3, n1p3, n4p3                               |
| 4      | GTR+I+G    | n5p2, n1p2, n4lp2, n4p2, n2p2, a6p2, n3p2, a8p2, n6p2 |
| 5      | HKY+G      | c3p3, c1p3, c2p3, a6p3, cbp3, n2p3, n6p3, n3p3, a8p3  |
| 6      | GTR+I+G    | n1p1, n4lp1, n5p1, n4p1                               |
| 7      | GTR+I+G    | c3p2, c1p2, c2p2, cbp2                                |
| 1      | MTREV+I+G  | c1, n4, n5, cb, c3, a6, a8, c2, n4l, n1, n3, n6       |
| 2      | MTREV+I+G  | n2                                                    |

**Table S3** Best model list from ModelFinder for 39 individual PCGs partitions (every PCG gene was part to tree partions as p1, p2 and p3) and 13 AA partitions for IQtree.

| <b>Best Model</b> | <b>Partition Names</b>        |
|-------------------|-------------------------------|
| HKY+F+R2          | n5p3, cbp3, n2p3, n6p3        |
| HKY+F+G4          | c1p3, n4lp3, a8p3, n1p3       |
| GTR+F+G4          | n4p2, c1p1, cbp1, n1p1        |
| K3Pu+F+I+G4       | n4lp1                         |
| F81+F+G4          | n3p2, a8p2, n6p2              |
| TVM+F+G4          | cbp2, n4lp2, c3p1, c2p1, c2p2 |
| GTR+I+G           | cbp2, c1p2, c2p2, cbp2        |
| GTR+F+I+G4        | n5p1, n4p1, n5p2              |
| TN+F+R2           | c2p3                          |
| TIM+F+G4          | n2p1                          |
| TN+F+G4           | a6p3, c3p3                    |
| K3Pu+F+G4         | c3p2, n6p1, n1p2, a6p2        |
| K3Pu+F+R2         | n3p3, a6p1, c1p2              |
| F81+F+R2          | a8p1                          |
| TIM2+F+G4         | n3p1                          |
| TPM2+F+G4         | n4p3                          |
| mtInv+G4          | n4l, c3                       |
| mtART+F+G4        | n4, a6, n3, n1, cb            |
| mtInv+F+G4        | n2                            |
| mtART+G4          | c1, a8                        |
| mtZOA+F+G4        | n6                            |
| mtART+F+I+G4      | n5, c2                        |

**Table S4** Synonymous and nonsynonymous substitutional analysis of 13 protein-coding genes

| <b>Genes</b> | <b>Ka</b> | <b>Ks</b> | <b>Ka/Ks</b> | <b>JKa</b> | <b>JKs</b> | <b>JKa/JKs</b> |
|--------------|-----------|-----------|--------------|------------|------------|----------------|
| <i>atp6</i>  | 0.23645   | 0.38139   | 0.61997      | 0.28589    | 0.54747    | 0.52220        |
| <i>atp8</i>  | 0.38877   | 0.33497   | 1.16061      | 0.55786    | 0.47281    | 1.17988        |
| <i>cox1</i>  | 0.11008   | 0.42749   | 0.25750      | 0.11948    | 0.65027    | 0.18374        |
| <i>cox2</i>  | 0.17502   | 0.40122   | 0.43622      | 0.20143    | 0.58626    | 0.34358        |
| <i>cox3</i>  | 0.19583   | 0.42471   | 0.46109      | 0.22817    | 0.64933    | 0.35139        |
| <i>cob</i>   | 0.15948   | 0.43764   | 0.36441      | 0.18006    | 0.67294    | 0.26757        |
| <i>nad1</i>  | 0.22266   | 0.33955   | 0.65575      | 0.26608    | 0.46157    | 0.57647        |
| <i>nad2</i>  | 0.36600   | 0.33715   | 1.08557      | 0.52444    | 0.46304    | 1.13260        |
| <i>nad3</i>  | 0.24033   | 0.39791   | 0.60398      | 0.29175    | 0.61191    | 0.47679        |
| <i>nad4</i>  | 0.26307   | 0.31060   | 0.84697      | 0.32633    | 0.40722    | 0.80136        |
| <i>nad4l</i> | 0.28697   | 0.29076   | 0.98697      | 0.36973    | 0.37384    | 0.98901        |
| <i>nad5</i>  | 0.27437   | 0.30554   | 0.89798      | 0.34405    | 0.39751    | 0.86551        |
| <i>nad6</i>  | 0.33660   | 0.33786   | 0.99627      | 0.45254    | 0.46958    | 0.96371        |

Abbreviations: Ka, synonymous substitutional rates; Ks, nonsynonymous substitutional rates; JKa, synonymous substitutional rates using the Jukes and Cantor (1969) correction; JKs: nonsynonymous substitutional rates using the Jukes and Cantor (1969) correction.

# Supplementary Figures S1–S4

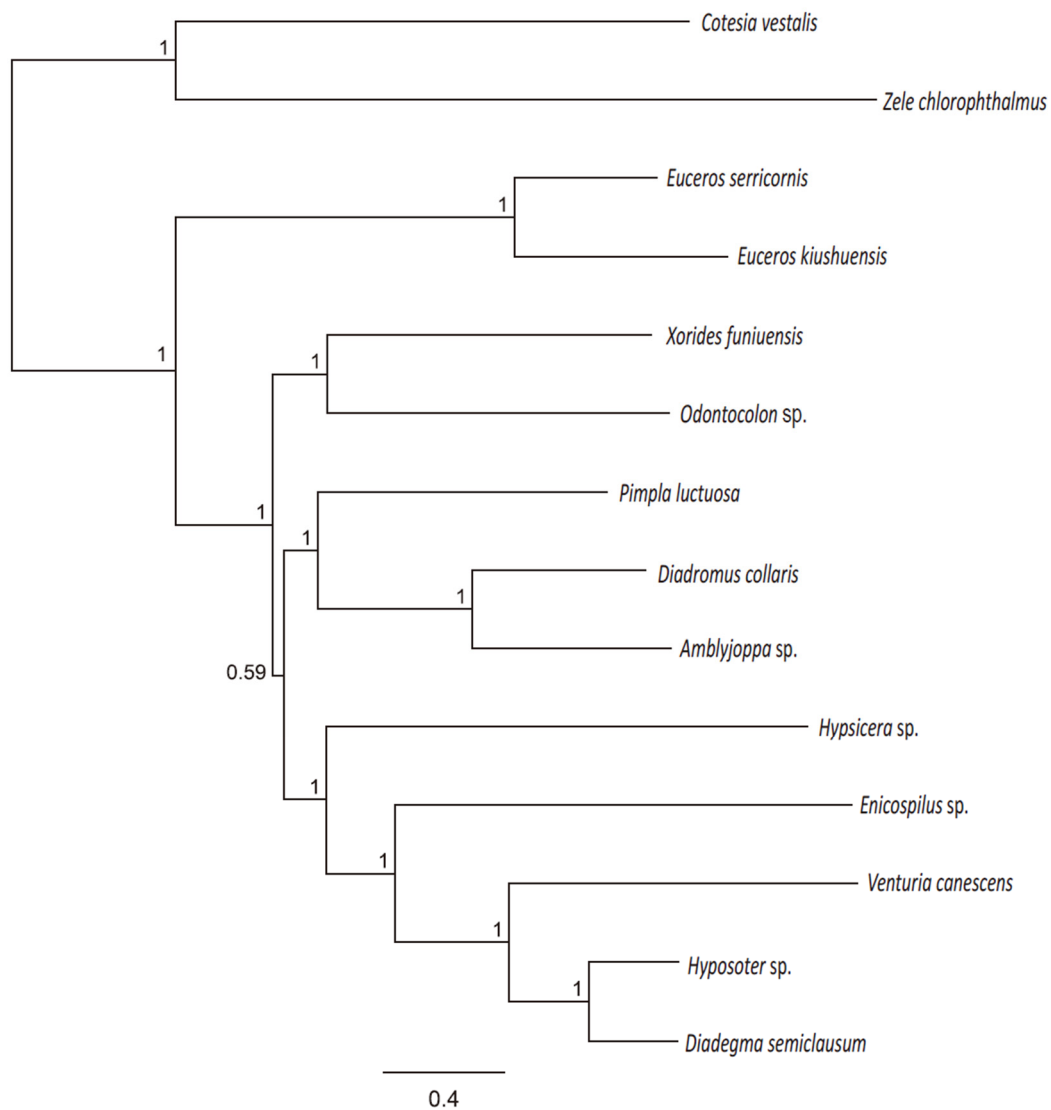

**Figure S1** Phylogenetic relationships of Ichneumonidae inferred from nucleotides (NU) sequences of 13 protein-coding genes in mitochondrial genomes by BI methods. *Zelex chlorophthalmus* and *Cotesia vestalis* from Braconidae were employed as outgroup. Numbers close to the branching points are Bayesian posterior probabilities (PP).

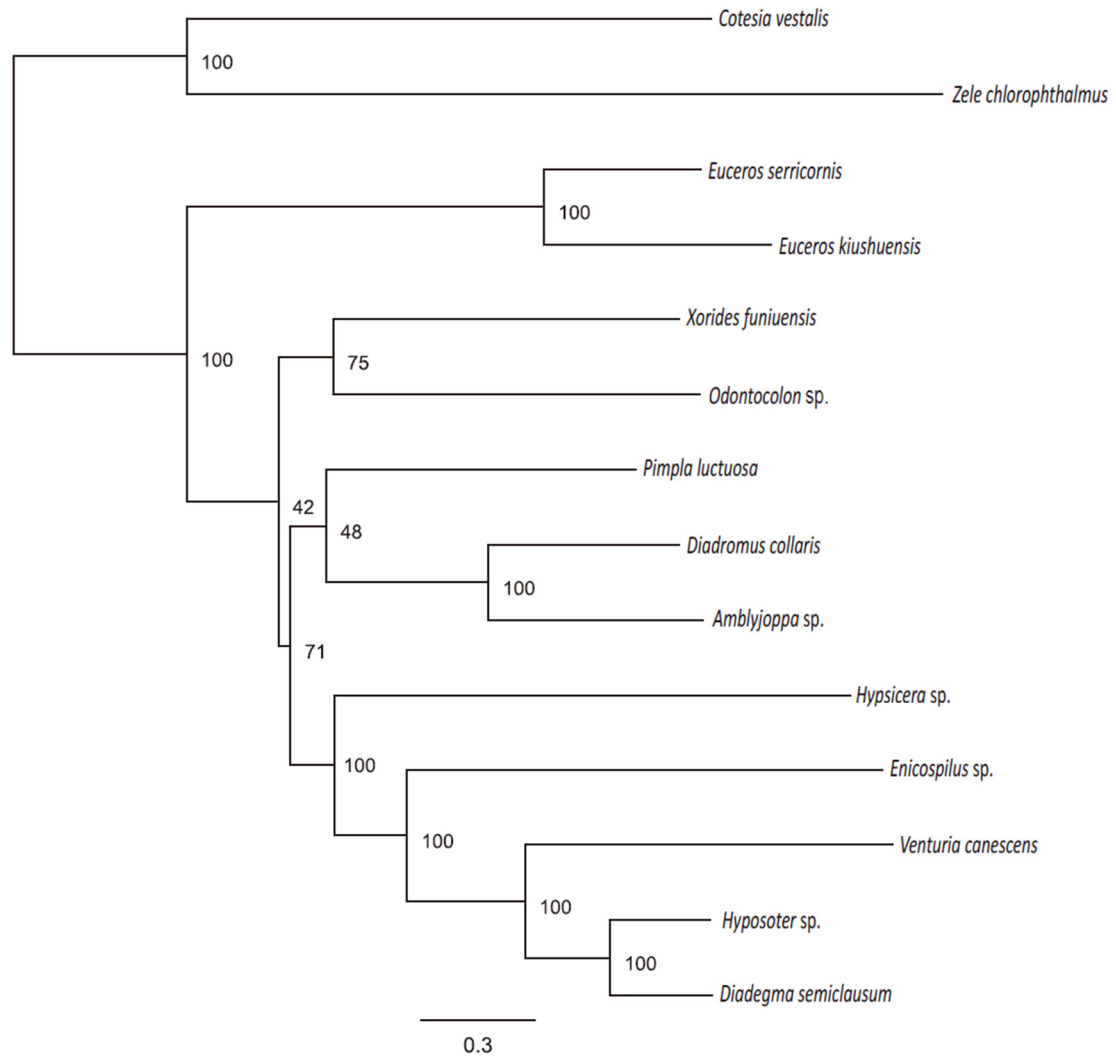

**Figure S2** Phylogenetic relationships of Ichneumonidae inferred from nucleotides (NU) sequences of 13 protein-coding genes in mitochondrial genomes by ML methods. *Zele chlorophthalmus* and *Cotesia vestalis* from Braconidae were employed as outgroup. Numbers close to the branching points are bootstrap values (BS) calculated by maximum likelihood method.

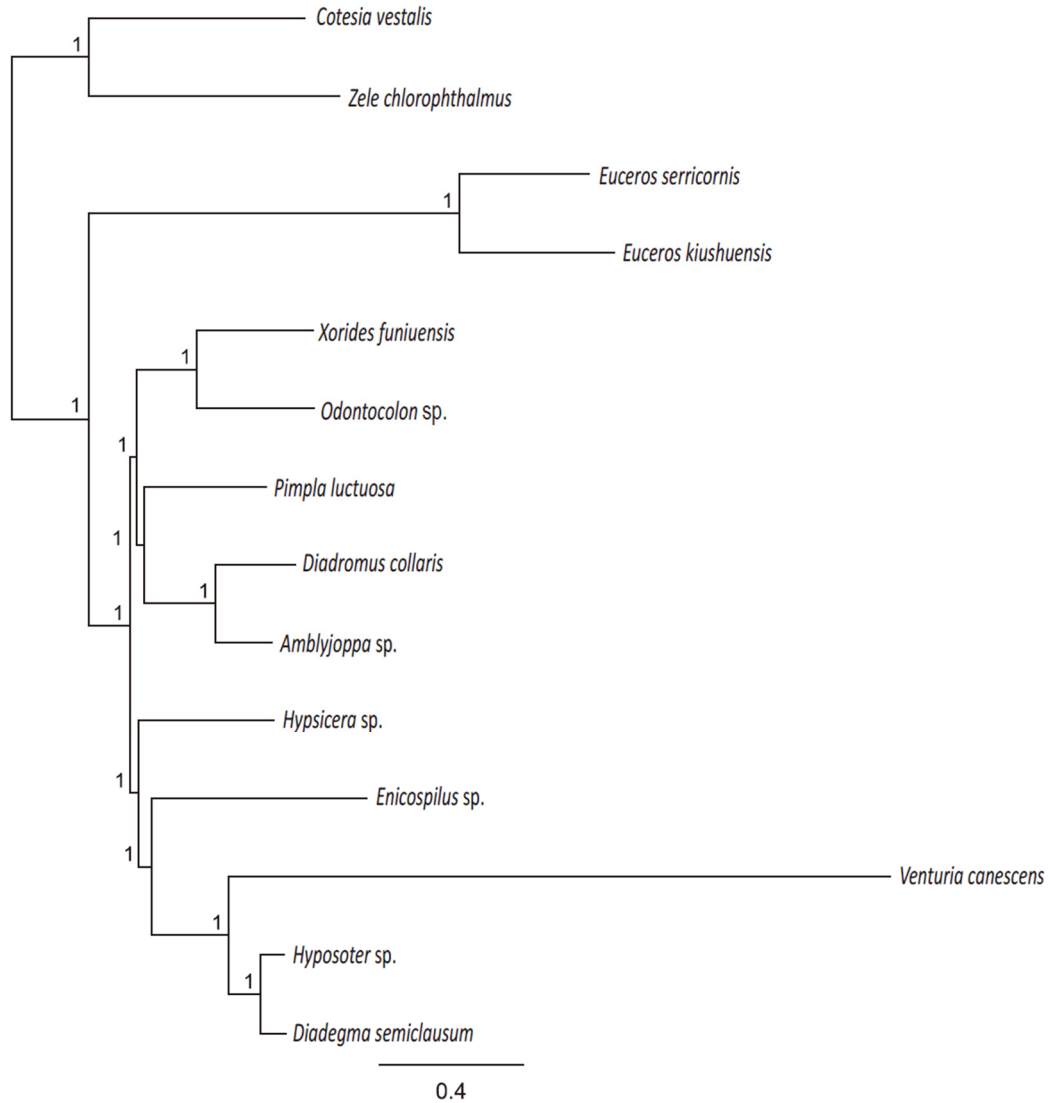

**Figure S3** Phylogenetic relationships of Ichneumonidae inferred from amino acids (AA) sequences of 13 protein-coding genes in mitochondrial genomes by BI methods. *Zele chlorophthalmus* and *Cotesia vestalis* from Braconidae were employed as outgroup. Numbers close to the branching points are Bayesian posterior probabilities (PP).

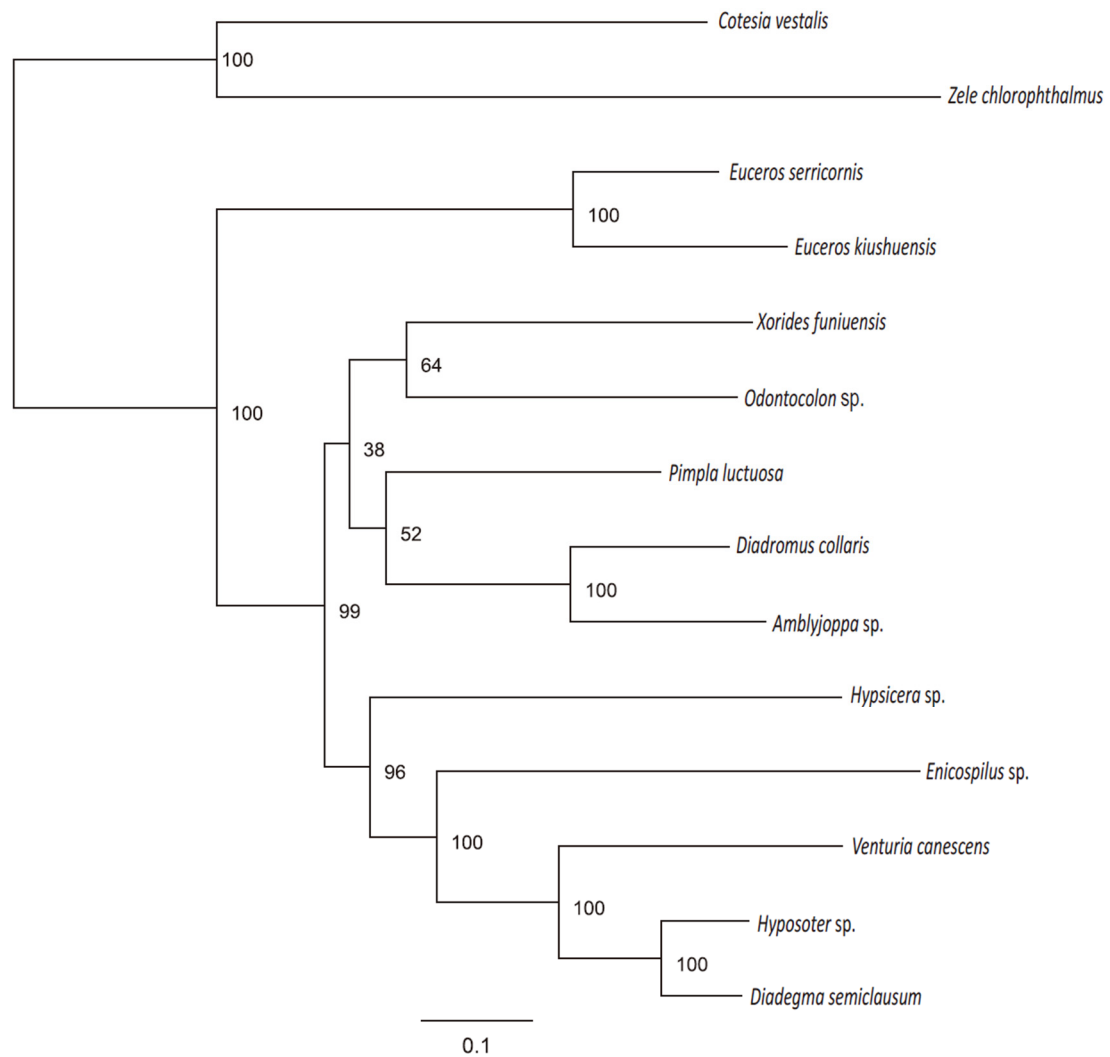

**Figure S4** Phylogenetic relationships of Ichneumonidae inferred from amino acids (AA) sequences of 13 protein-coding genes in mitochondrial genomes by ML methods. *Zelet chlorophthalmus* and *Cotesia vestalis* from Braconidae were employed as outgroup. Numbers close to the branching points are bootstrap values (BS) calculated by maximum likelihood method.
